# Supplementary material
Source: publisher figshare collection journal article supplement (https://tandf.figshare.com/ndownloader/files/12824516)
Supplement: Supplementary file 1 [file 12824516]

**Supplemental online material**

**Selective adsorption and separation of illegal cationic dyes from foodstuffs with anionic polyelectrolyte functionalization of metal-organic frameworks**

Xue Wang,Hui-Ling Duan, Shi-Yao Ma, Jun Wang, Han-Ying Zhan, Zhi-Qi Zhang[[1]](#footnote-1)*

Key Laboratory of Analytical Chemistry for Life Science of Shaanxi Province and Key Laboratory of Medicinal Resources and Natural Pharmaceutical Chemistry of the Ministry of Education, Shaanxi Normal University, Xi’an 710062, China

**Contents**

Figure S1. FT-IR spectra of the MIL-101(Cr)-NH2 and MIL-101(Cr)-PSS

Figure S2. EDX spectra of MIL-101(Cr)-NH2 (a) and MIL-101(Cr)-PSS (b)

Figure S3. TG curves of MIL-101(Cr)-NH2 and MIL-101(Cr)-PSS


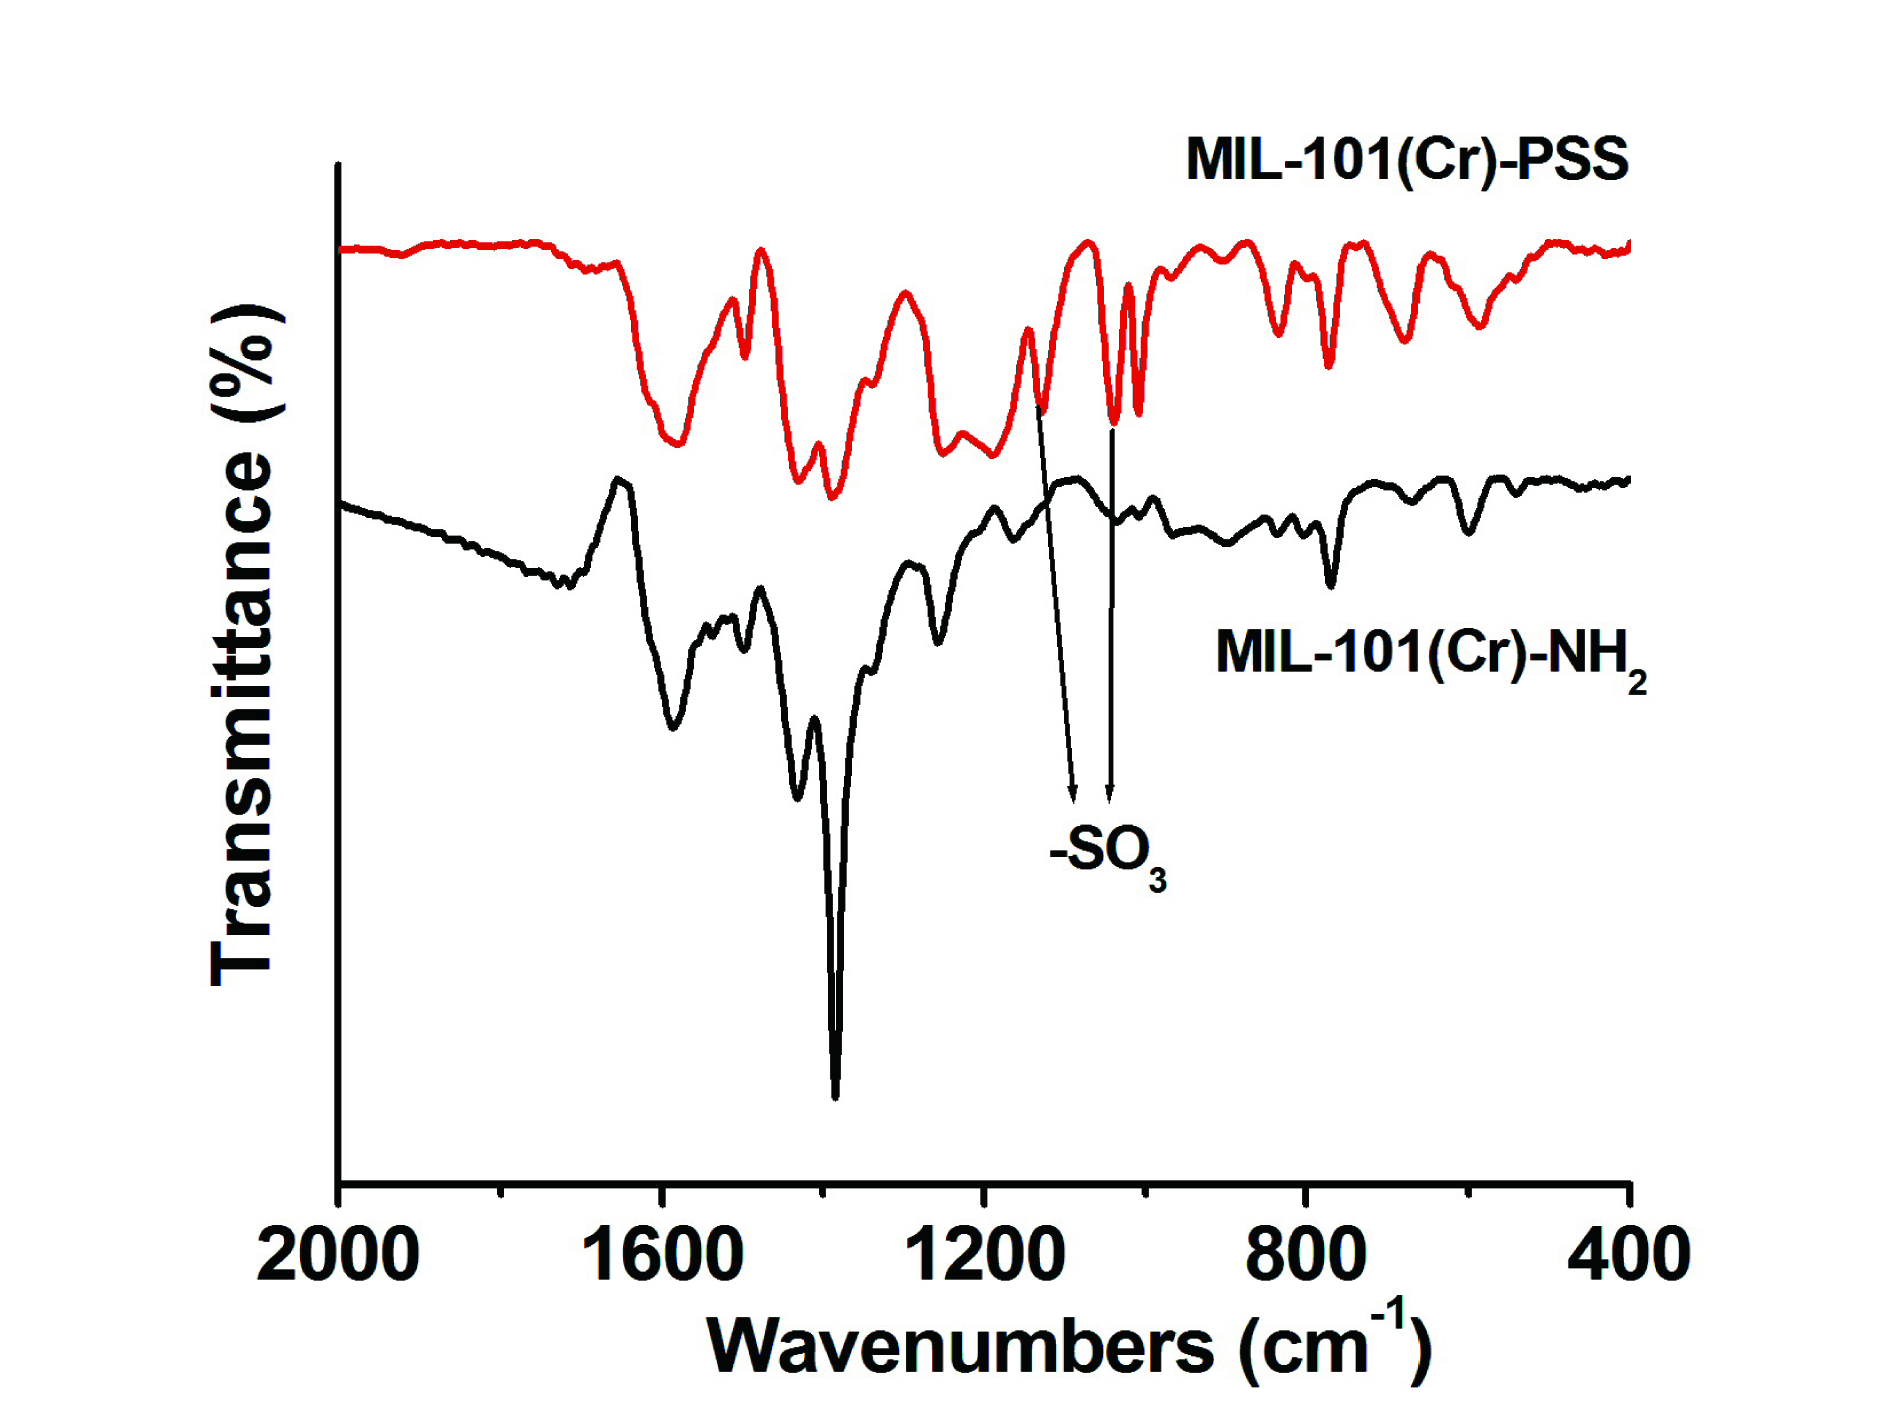
Figure S1. FT-IR spectra of the MIL-101(Cr)-NH2 and MIL-101(Cr)-PSS


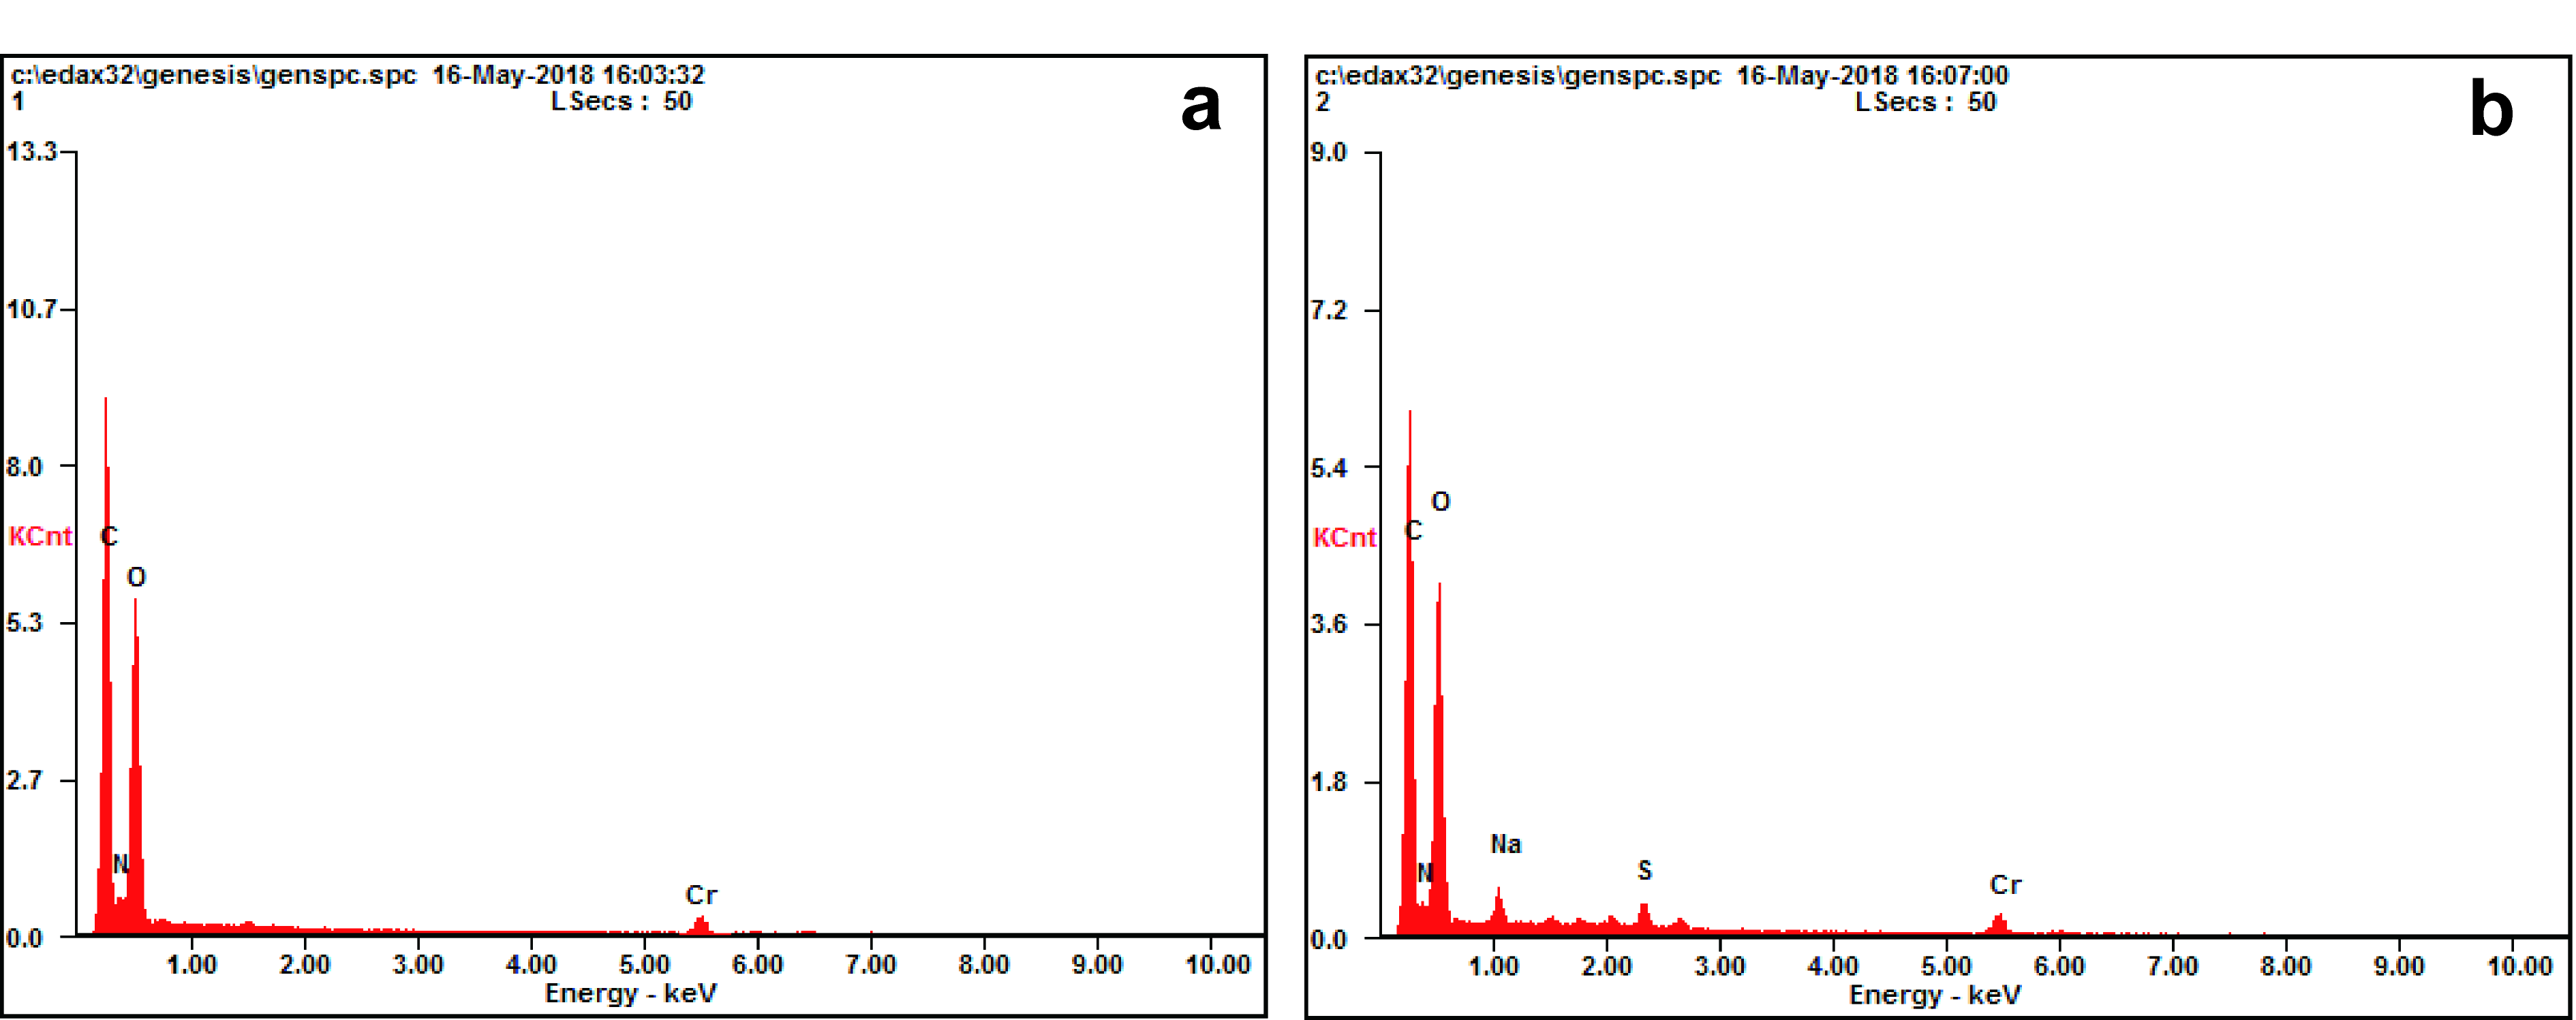
Figure S2. EDX spectra of MIL-101(Cr)-NH2 (a) and MIL-101(Cr)-PSS (b)


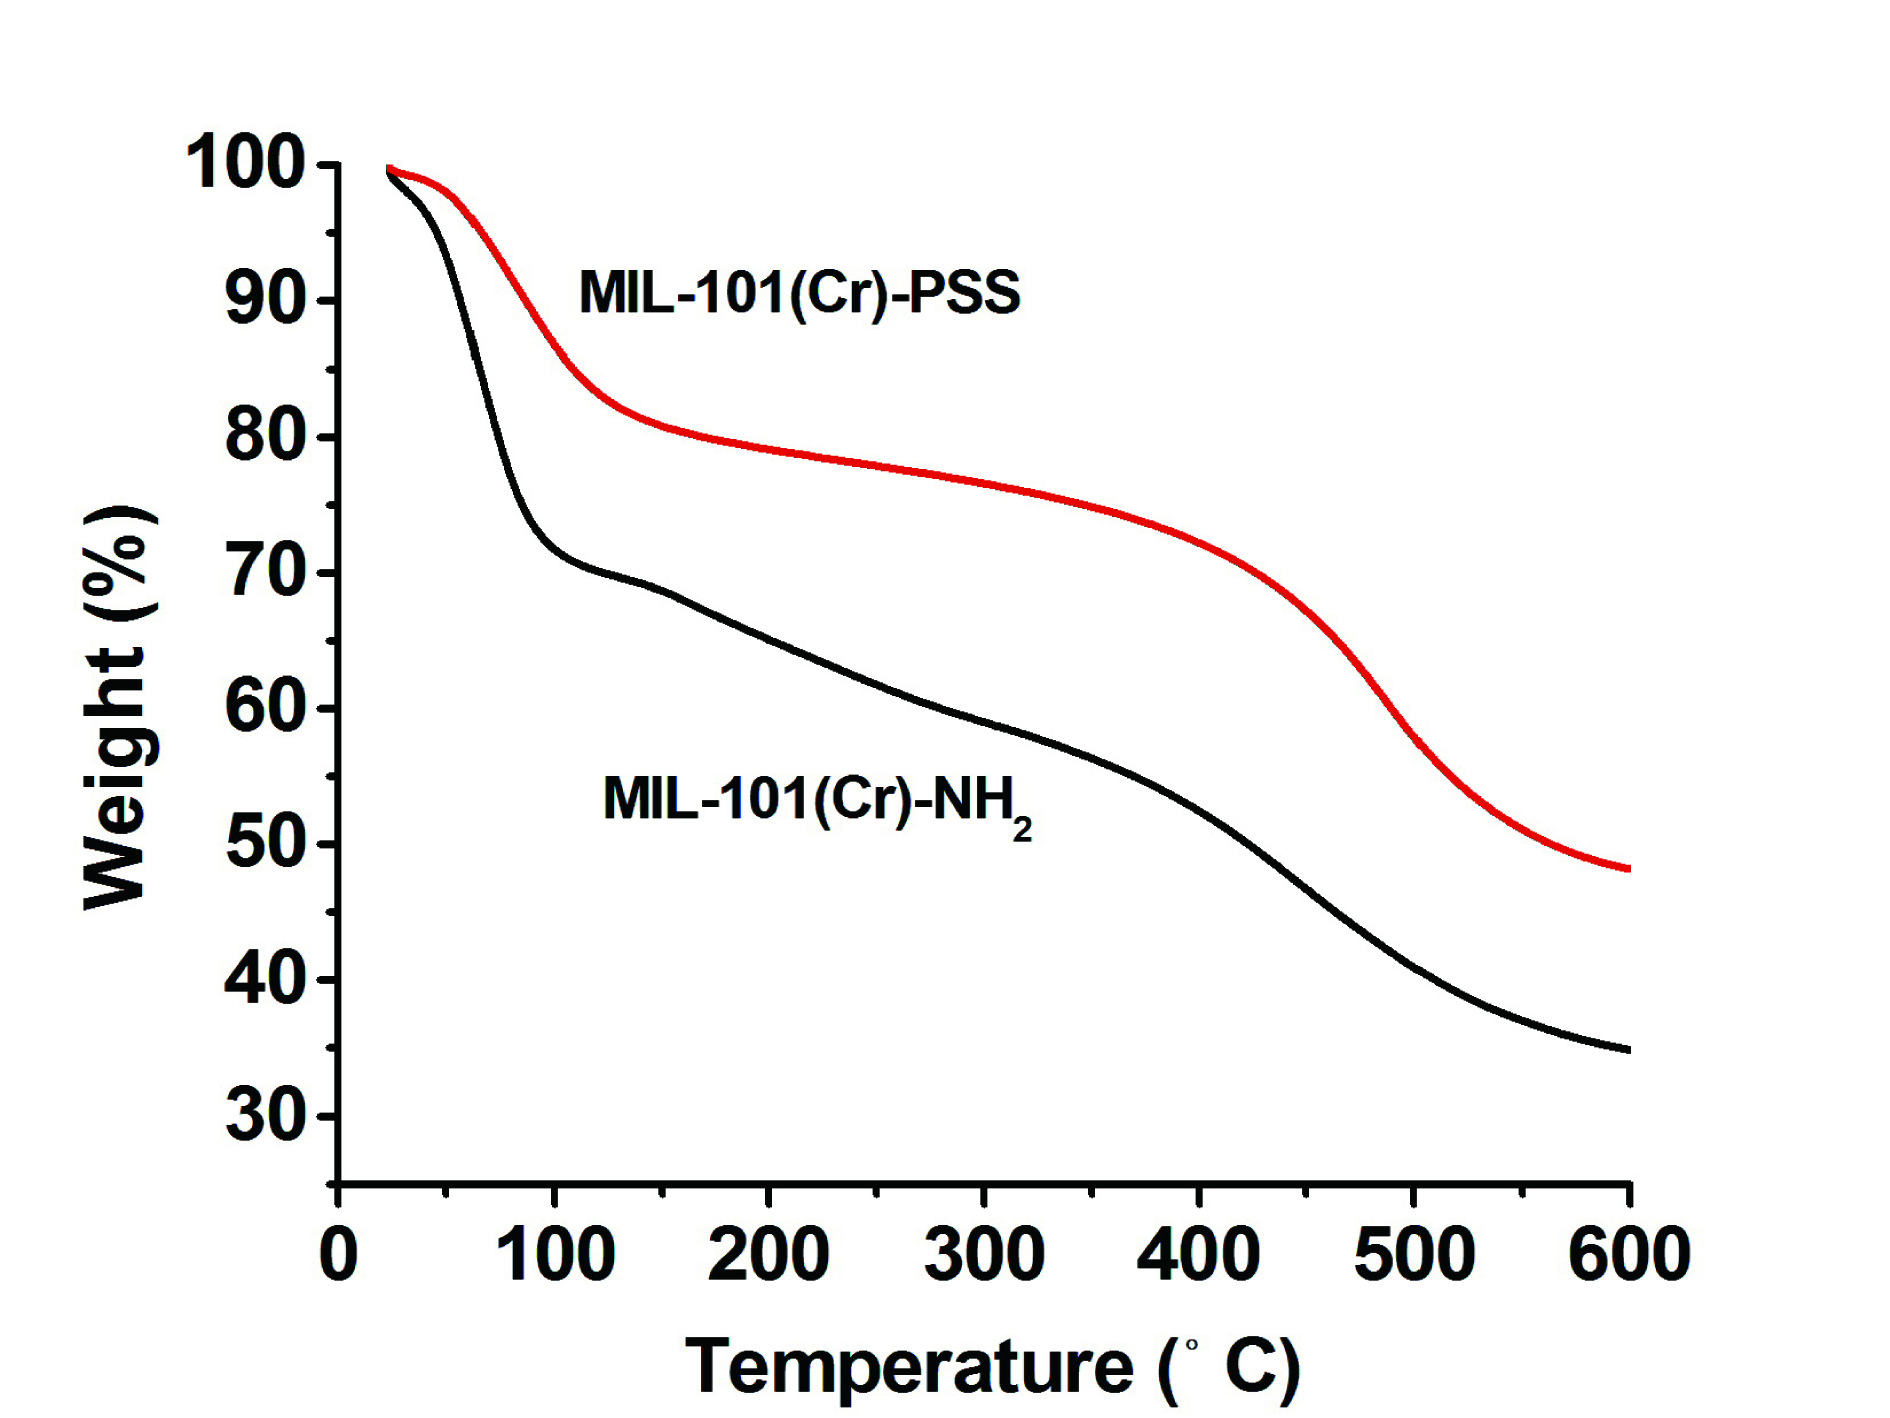
Figure S3. TGA curves of MIL-101(Cr)-NH2 and MIL-101(Cr)-PSS

The first weight loss was surface water molecules losing, and then the structures of MIL-101(Cr)-NH2 were destroyed.

1. * Corresponding author. Fax: +86 29 81530792.

   E-mail address: zqzhang@snnu.edu.cn. [↑](#footnote-ref-1)
